# Supplementary material for: Psychometric properties of the Thai Mood and Feelings Questionnaire (MFQ) for adolescent depression
Source: Springer Nature journal article supplement (doi:10.1186/s13034-021-00372-8), 2021-04-09
Supplement: 13034_2021_372_MOESM1_ESM.pdf [file 13034_2021_372_MOESM1_ESM.pdf]

## Mood and Feelings Questionnaire (MFQ)

แบบประเมินนี้เป็นแบบประเมินเกี่ยวกับความรู้สึกหรือการกระทำในปัจจุบัน

กรุณาใส่เครื่องหมาย ✓ ลงในช่องที่ตรงกับความรู้สึกหรือการกระทำของท่านในระยะ 2 สัปดาห์ที่ผ่านมา

ถ้าข้อความไหนไม่ตรงกับตัวท่าน

ให้ทำเครื่องหมาย ✓ ตรงช่อง ไม่จริง

ถ้าข้อความไหนตรงกับตัวท่านบางครั้ง

ให้ทำเครื่องหมาย ✓ ตรงช่อง จริงบางครั้ง

ถ้าข้อความไหนตรงกับตัวท่านเป็นส่วนใหญ่

ให้ทำเครื่องหมาย ✓ ตรงช่อง จริง

| กรุณาใส่เครื่องหมาย ✓ ในทุกข้อความ                 | ไม่จริง | จริงบางครั้ง | จริง |
|----------------------------------------------------|---------|--------------|------|
| 1. ฉันรู้สึกเศร้าหรือไม่มีความสุข                  |         |              |      |
| 2. ฉันไม่เพลิดเพลินกับสิ่งใดเลย                    |         |              |      |
| 3. ฉันหิวน้อยกว่าปกติ                              |         |              |      |
| 4. ฉันกินมากขึ้นกว่าปกติ                           |         |              |      |
| 5. ฉันรู้สึกอ่อนเพลีย ฉันมักนั่งเฉยๆและไม่ทำอะไร   |         |              |      |
| 6. ฉันเคลื่อนไหวช้าและเดินช้ากว่าปกติ              |         |              |      |
| 7. ฉันกระสับกระส่ายอย่างมาก                        |         |              |      |
| 8. ฉันรู้สึกว่าฉันไม่มีอะไรดีเลย                   |         |              |      |
| 9. ฉันตำหนิตัวเองในสิ่งที่ไม่ใช่ความผิดของฉัน      |         |              |      |
| 10. มันยากสำหรับฉันที่จะทำการตัดสินใจในเรื่องต่างๆ |         |              |      |
| 11. ฉันรู้สึกหงุดหงิดและฉุนเฉียวกับพ่อแม่          |         |              |      |
| 12. ฉันรู้สึกว่าฉันพุดน้อยลงกว่าปกติ               |         |              |      |
| 13. ฉันพุดช้าลงกว่าปกติ                            |         |              |      |
| 14. ฉันร้องไห้บ่อยมาก                              |         |              |      |
| 15. ฉันคิดว่าในอนาคตไม่มีสิ่งดี ๆ รอฉันอยู่        |         |              |      |

| กรุณาใส่เครื่องหมาย ✓ ในทุกข้อความ                   | ไม่จริง | จริงบางครั้ง | จริง |
|------------------------------------------------------|---------|--------------|------|
| 16. ฉันคิดว่าชีวิตฉันไม่มีค่าพอที่จะมีชีวิตอยู่      |         |              |      |
| 17. ฉันคิดถึงความตายหรือภาวะใกล้ตาย                  |         |              |      |
| 18. ฉันคิดว่าครอบครัวคงจะดีกว่านี้ถ้าไม่มีฉันอยู่    |         |              |      |
| 19. ฉันมีความคิดเกี่ยวกับการฆ่าตัวตาย                |         |              |      |
| 20. ฉันไม่อยากเจอเพื่อน ๆ                            |         |              |      |
| 21. ฉันพบว่าการใช้ความคิดหรือการมีสมาธิเป็นเรื่องยาก |         |              |      |
| 22. ฉันคิดว่าสิ่งร้ายๆอาจจะเกิดขึ้นกับฉัน            |         |              |      |
| 23. ฉันเกลียดตัวเอง                                  |         |              |      |
| 24. ฉันคิดว่าฉันเป็นคนไม่ดี                          |         |              |      |
| 25. ฉันคิดว่าฉันหน้าตาน่าเกลียด                      |         |              |      |
| 26. ฉันกังวลเกี่ยวกับการเจ็บปวด                      |         |              |      |
| 27. ฉันรู้สึกโดดเดี่ยว                               |         |              |      |
| 28. ฉันคิดว่าไม่มีใครรักฉันอย่างแท้จริง              |         |              |      |
| 29. ฉันไม่สนุกเวลาที่อยู่โรงเรียน                    |         |              |      |
| 30. ฉันคิดว่าฉันไม่สามารถดีได้เท่ากับเด็กคนอื่น      |         |              |      |
| 31. ฉันทำทุกอย่างผิดเสมอ                             |         |              |      |
| 32. ฉันนอนไม่ค่อยหลับเมื่อเทียบกับปกติ               |         |              |      |
| 33. ฉันนอนมากกว่าปกติ                                |         |              |      |

## วิธีการใช้เครื่องมือ

แบบประเมิน MFQ ใช้กับเด็กและวัยรุ่นอายุ 8 – 18 ปี

## วิธีการคิดคะแนน

แบบประเมิน MFQ ประกอบไปด้วยคำถามที่เกี่ยวข้องกับความรู้สึกหรือการกระทำในปัจจุบัน จำนวน 33 ข้อคำถาม ผู้ทำแบบประเมินจะต้องเลือกความถี่ของอาการที่เกิดขึ้นในช่วง 2 สัปดาห์ที่ผ่านมา โดยการให้คะแนนจะให้ตามระดับความถี่ของอาการที่เกิดขึ้น ประกอบด้วย

ไม่จริง = 0

จริงบางครั้ง = 1

จริง = 2

## การแปลผล

ผู้ที่ได้คะแนนรวมสูงกว่า 28 คะแนนขึ้นไปจากการคัดกรองถือว่ามีความเสี่ยงในการมีภาวะซึมเศร้า

## ชื่อผู้พัฒนา

นางสาวนันทกา พุสีกุล

## ตำแหน่งปัจจุบัน

อาจารย์ประจำสาขาจิตวิทยาการศึกษาและการแนะแนว

## สถานที่ทำงาน

ภาควิชาพื้นฐานและการพัฒนาการศึกษา คณะศึกษาศาสตร์  
มหาวิทยาลัยเชียงใหม่

## เอกสารอ้างอิง

Angold A, Costello E. J, Pickles A. & Winder F. The development of a questionnaire for use in epidemiological studies of depression in children and adolescents. London Med Res Council Child Psychiatry Unit. 1987.
